# Textbook of Traumatic Brain Injury, Third Edition

Edited by Jonathan M. Silver, M.D., Thomas W. McAllister, M.D., and David B. Arciniegas, M.D.

Despite the increased public awareness of traumatic brain injury (TBI), the complexities of the neuropsychiatric, neuropsychological, neurological, and other physical consequences of TBI of all severities across the lifespan remain incompletely understood by patients, their families, healthcare providers, and the media.

The *Textbook of Traumatic Brain Injury*, Third Edition, comprehensively fills this gap in knowledge. Chapters new to this edition include biomechanical forces, biomarkers, neurodegenerative dementias, suicide, endocrine disorders, chronic disease management, and social cognition. An entirely new section is devoted to the evaluation and treatment of mild TBI, including injuries in athletes, military service members and veterans, and children and adolescents. These chapters join newly updated sections on the assessment and treatment of the cognitive, emotional, behavioral, and other physical sequelae of TBI.

The *Textbook of Traumatic Brain Injury* is a must-read for all of those working in any of the multitude of disciplines that contribute to the care and rehabilitation of persons with brain injury.

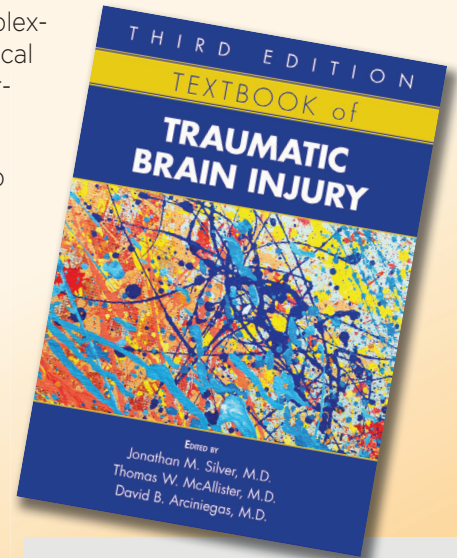

2019 • 985 pages • ISBN 978-1-61537-112-9  
Hardcover • \$195.00 • Item #37112  
2019 • 985 pages • ISBN 978-1-61537-247-8  
eBook • \$156.00 • Item #37247

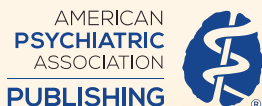

Order online @ [appi.org](http://appi.org)  
or Call Toll Free: 1-800-368-5777  
Email: [appi@psych.org](mailto:appi@psych.org)

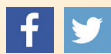

20% Discount for American Psychiatric Association Members  
25% Discount for APA Resident-Fellow Members

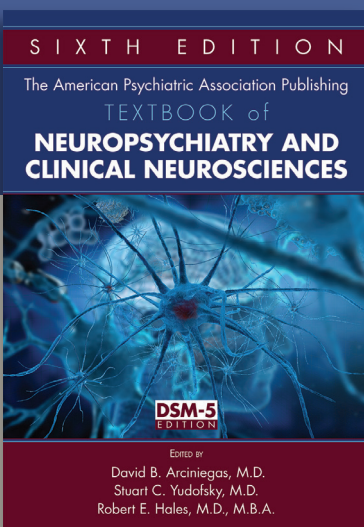

## The American Psychiatric Association Publishing Textbook of Neuropsychiatry and Clinical Neurosciences, Sixth Edition

For more than three decades, the *Textbook of Neuropsychiatry and Clinical Neurosciences* has been the gold standard for understanding the structural and functional foundations and rapidly evolving knowledge base of neuropsychiatric disorders. In the new edition, the esteemed editors have undertaken a complete reorganization, reconceptualizing the way the material is presented and integrating considerations of neuropsychiatric symptoms, syndromes, and treatments into chapters addressing the neuropsychiatry of neurodevelopmental disorders,

acquired neurological conditions, neurodegenerative disorders, and primary psychiatric disorders.

The *Textbook of Neuropsychiatry and Clinical Neurosciences* provides comprehensive, current, and evidence-based coverage in a forward-looking volume.

2018 • 624 pages • ISBN 978-1-58562-487-4  
Hardcover • \$220.00 • Item #62487  
2018 • 624 pages • ISBN 978-1-61537-187-7  
eBook • \$207.00 • Item #37187

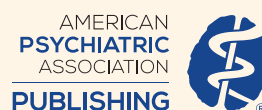

Order online @ [appi.org](http://appi.org)  
or Call Toll Free: 1-800-368-5777  
Email: [appi@psych.org](mailto:appi@psych.org)

20% Discount for American Psychiatric Association Members  
25% Discount for APA Resident-Fellow Members

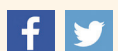

# ▶ PODCASTS from APA Publishing

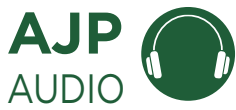

## AJP Audio

Host: Michael D. Roy, Executive Editor, *The American Journal of Psychiatry*

Each episode features an in-depth interview with an author from the most discussed article appearing in the latest issue of *The American Journal of Psychiatry*.

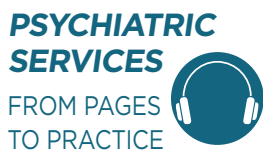

## Psychiatric Services From Pages to Practice

Hosts: Lisa Dixon, M.D., M.P.H., Editor, *Psychiatric Services*, and Josh Berezin, M.D., M.S.

Learn about the latest mental health services research published in *Psychiatric Services* and why it is relevant. Topics include community-based treatment programs, collaborative care, evidence-based treatment and service delivery, criminal and social justice, policy analysis, and more.

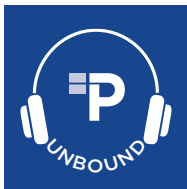

## Psychiatry Unbound

Host: Laura Roberts, M.D., M.A., Editor-in-Chief, APA Publishing Books

APA Publishing's Books podcast offers the opportunity to hear the voices behind the most prominent psychiatric scholarship in the field today. Learn about important topics in the field of psychiatry and see how our authors are making an impact in clinical settings throughout the world.

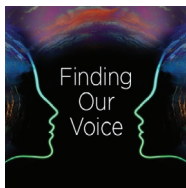

## Finding Our Voice

Host: Sanya Virani, MBBS, MPH

**Finding Our Voice** brings the viewpoints and opinions of the next generation of psychiatrists—including residents, fellows, and early career psychiatrists—to the forefront. Topics covered include systemic racism and social determinants.

**Subscribe Today!**

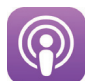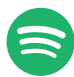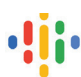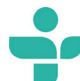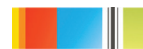

AMERICAN  
PSYCHIATRIC  
ASSOCIATION  
PUBLISHING

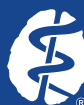

Source: http://neuro.psychiatryonline.org/doi/suppl/10.1176/jnp.2022.34.issue-1/suppl_file/back.pdf
