# PSYCHIATRYonline

Your Destination for Lifelong Learning in Psychiatry

The one-stop resource for information on diagnosis, treatment, guidelines, the latest research, and breaking news from the field.

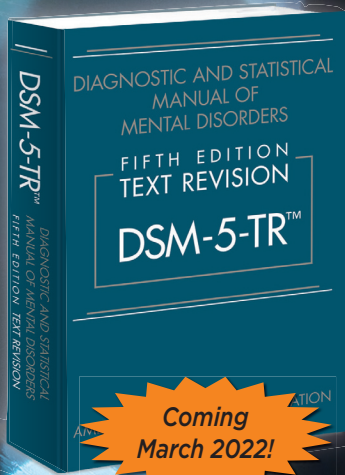

Coming  
March 2022!

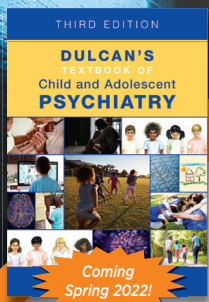

Coming  
Spring 2022!

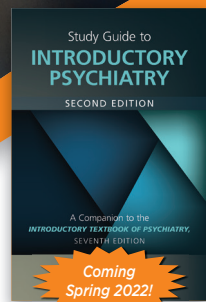

Coming  
Spring 2022!

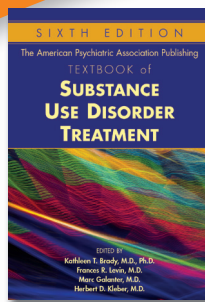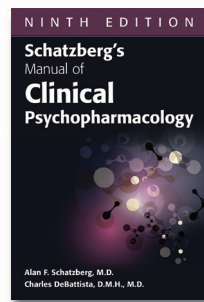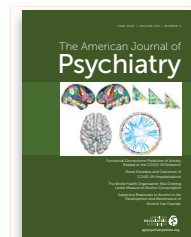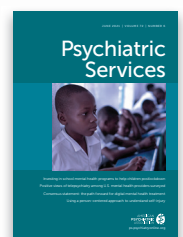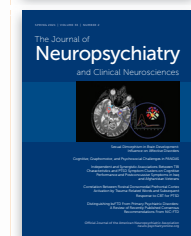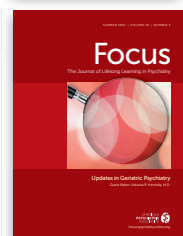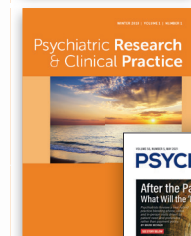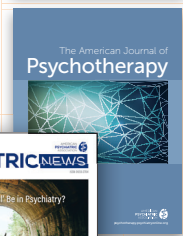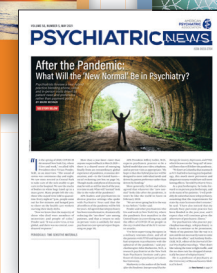

**PsychiatryOnline.org** is the platform for all American Psychiatric Association Publishing journals, DSM-5® (DSM-5-TR™ coming in March 2022), and bestselling textbooks, as well as APA Practice Guidelines, and continuing medical education.

This is a one-stop resource for information on psychiatric diagnosis, treatment, guidelines, the latest research, and breaking news from the field. From a single location, users can search across all books and journals to find the most relevant content easier than ever.

Subscribe to products individually or to the DSM Select package that includes the DSM-5® library, books and select journals.

**Go to [www.appi.org](http://www.appi.org) to subscribe.**

*Institutional subscription options are available.*

*For more information contact: [institutions@psych.org](mailto:institutions@psych.org);  
800-368-5777 ext. 3729*

AMERICAN  
PSYCHIATRIC  
ASSOCIATION  
PUBLISHING

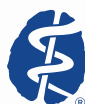

[psychiatryonline.org](http://psychiatryonline.org)

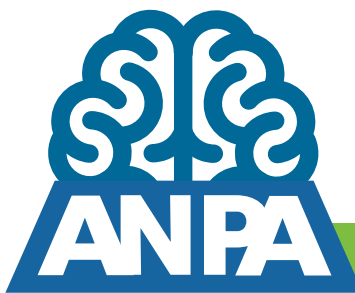

# The American Neuropsychiatric Association

The American Neuropsychiatric Association (ANPA), established in 1988, is an organization of professionals in neuropsychiatry, behavioral neurology, neuropsychology and the clinical neurosciences. Our mission is to improve the lives of people with disorders at the interface of psychiatry and neurology.

Our diverse membership is comprised of professionals in all areas of neuroscience who share clinical and/or academic interests in neuropsychiatry. *The Journal of Neuropsychiatry and Clinical Neurosciences (JNCN)* is the official publication of the organization, and a subscription is a benefit of membership.

ANPA holds an annual scientific meeting that provides the opportunity for attendees to earn continuing education and maintenance of certification credits, as well as the opportunity for collaboration among educators, clinicians, researchers, students and trainees during research presentations, symposia, workshops, and continuing education courses. Members are encouraged to submit their work for presentation at our annual meetings. Travel awards are available for promising trainee clinicians and investigators. Annual meeting abstracts and proceedings are published in *The Journal of Neuropsychiatry and Clinical Neurosciences (JNCN)*, the official publication of the organization.

## Benefits of Membership

- Subscription to *The Journal of Neuropsychiatry and Clinical Neurosciences (JNCN)*
- Discounts on subscriptions to PsychiatryOnline.com including DSM Premium and DSM Premium Plus
- Opportunities for presenting at the annual meeting with accepted abstracts published in the *JNCN*
- Significantly reduced registration fees to the annual meeting
- Discounted membership and meeting registration fees for trainees and students
- Newsletters, news updates, information on job and training opportunities, research and meeting information on the ANPA web site: [www.anpaonline.org](http://www.anpaonline.org)
- Collaboration in clinical, educational and research activities with opportunities to interact with leaders in the field
- Complimentary video recordings of the annual meetings
- Access to educational slide sets assembled by the Education Committee
- Membership in Special Interest Groups (SIGs) designed to draw together ANPA members with similar clinical, research, and academic interests for the purposes of peer discussion, education, and potential collaboration

**Join ANPA now!**

Website: [www.anpaonline.org](http://www.anpaonline.org)

Email: [anpaoffice@gmail.com](mailto:anpaoffice@gmail.com)

Don't miss ANPA's 32nd Annual Meeting

**March 16 - 20, 2022**

**VIRTUAL**

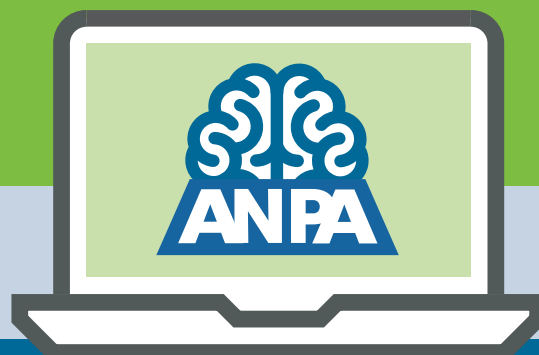

Register online at [www.anpaonline.org](http://www.anpaonline.org)

Coming March 2022!

## Diagnostic and Statistical Manual of Mental Disorders, Fifth Edition, Text Revision (DSM-5-TR™)

American Psychiatric Association

The *Diagnostic and Statistical Manual of Mental Disorders*, Fifth Edition, Text Revision (DSM-5-TR), is the most comprehensive, current, and critical resource for clinical practice available to today's mental health clinicians and researchers. DSM-5-TR includes the fully revised text and references, updated diagnostic criteria and ICD-10-CM codes since DSM-5 was published in 2013. It features a new disorder, Prolonged Grief Disorder, as well as codes for suicidal behavior available to all clinicians of any discipline without the requirement of any other diagnosis.

With contributions from over 200 subject matter experts, this updated volume boasts the most current text updates based on the scientific literature. Now in four-color and with the ability to authenticate each printed copy, DSM-5-TR provides a cohesive, updated presentation of criteria, diagnostic codes, and text. This latest volume offers a common language for clinicians involved in the diagnosis and study of mental disorders and facilitates an objective assessment of symptom presentations across a variety of clinical settings—inpatient, outpatient, partial hospital, consultation-liaison, clinical, private practice, and primary care.

2022 • 1,250 pages • ISBN 978-0-89042-575-6 • Hardcover • \$220.00 • Item #2575

2022 • 1,250 pages • ISBN 978-0-89042-576-3 • Paperback • \$170.00 • Item #2576

2022 • 1,250 pages • ISBN 978-0-89042-577-0 • eBook • \$136.00 • Item #2577

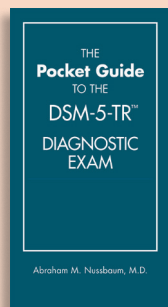

### The Pocket Guide to the DSM-5-TR® Diagnostic Exam

Abraham M. Nussbaum, M.D., M.T.S.

2022 • 295 pages  
ISBN 978-1-61537-357-4  
Paperback • \$75.00 • Item #37357

2022 • 295 pages  
ISBN 978-1-61537-358-1  
eBook • \$60.00 • Item #37358

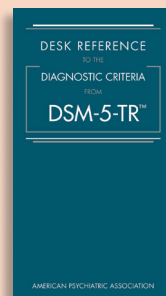

### Desk Reference to the Diagnostic Criteria from DSM-5-TR®

American Psychiatric Association

2022 • 450 pages  
ISBN 978-0-89042-579-4  
Paperback • \$75.00 • Item #2579

2022 • 450 pages  
ISBN 978-0-89042-580-0  
Spiralbound • \$75.00 • Item #2580

2022 • 450 pages  
ISBN 978-0-89042-581-7  
eBook • \$60.00 • Item #2581

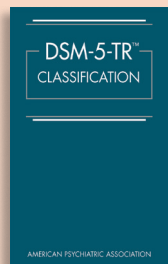

### DSM-5-TR® Classification

American Psychiatric Association

2022 • 150 pages  
ISBN 978-0-89042-583-1  
Spiralbound • \$35.00 • Item #2583

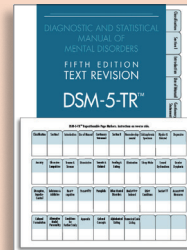

### DSM-5-TR® Repositionable Page Markers

American Psychiatric Association

2022 • 1 page  
ISBN 978-0-89042-582-4  
Repositionable Page Markers  
\$12.50 • Item #2582

AMERICAN  
PSYCHIATRIC  
ASSOCIATION  
PUBLISHING

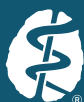

20% Discount for American Psychiatric Association Members

25% Discount for APA Resident-Fellow Members

▶ ORDER @ [www.appi.org](http://www.appi.org) | Email: [appi@psych.org](mailto:appi@psych.org) | Toll Free: 1-800-368-5777
